# Supplementary material for: Synthesis and spectroscopic properties of carotenoid bis-phenylhydrazone astaxanthin: extending conjugation to a CN group
Source: Royal Society of Chemistry journal article supplement (doi:10.1039/d4nj02282c), 2024-01-01
Supplement: d4nj02282c1.pdf [file d4nj02282c1.pdf]

## SUPPORTING INFORMATION

### **Synthesis and spectroscopic properties of carotenoid bis-phenylhydrazone astaxanthin: Extending conjugation to a C=N group**

Emrah Özcan<sup>\*,a</sup>, Gürkan Keleşan<sup>a</sup>, Pavel Chábera<sup>b</sup>, Radek Litvín<sup>c</sup>, Tomáš Polívka<sup>a</sup>

<sup>a</sup>Department of Physics, Faculty of Science, University of South Bohemia, Branišovská 1760, 370 05 České Budějovice, Czech Republic.

<sup>b</sup>Division of Chemical Physics, Department of Chemistry Lund University, Box 142, SE-221 00 Lund, Sweden.

<sup>c</sup>Department of Chemistry, Faculty of Science, University of South Bohemia, Branišovská 1760, 370 05 České Budějovice, Czech Republic.

\*Corresponding author. Email: [ozcane00@prf.jcu.cz](mailto:ozcane00@prf.jcu.cz)

## TABLE OF CONTENTS

|                                                                                                                                                                                                                                                                                                                                                                                                                                                                           |    |
|---------------------------------------------------------------------------------------------------------------------------------------------------------------------------------------------------------------------------------------------------------------------------------------------------------------------------------------------------------------------------------------------------------------------------------------------------------------------------|----|
| <b>Figure S1:</b> Positive ion and linear mode MALDI TOF-MS spectrum of <b>BPH-Asx</b> , ESI-MS spectra of <b>BPH-Asx</b> .....                                                                                                                                                                                                                                                                                                                                           | 2  |
| <b>Figure S2:</b> <sup>1</sup> H NMR Spectrum of a) <b>Asx</b> b) <b>BPH-Asx</b> in CDCl <sub>3</sub> .....                                                                                                                                                                                                                                                                                                                                                               | 3  |
| <b>Figure S3</b> <sup>13</sup> C NMR Spectrum of <b>BPH-Asx</b> in CDCl <sub>3</sub> .....                                                                                                                                                                                                                                                                                                                                                                                | 4  |
| <b>Figure S4:</b> FT-IR Spectrum of <b>Asx</b> (red) and <b>BPH-Asx</b> (blue).....                                                                                                                                                                                                                                                                                                                                                                                       | 5  |
| <b>Figure S5:</b> Normalized HPLC chromatograms of <b>Asx</b> (black) and <b>BPH-Asx</b> (red). Elution times of identified peaks are shown in the graph. The black chromatogram of <b>Asx</b> shows a single peak at 11.1 assigned to <i>all-trans</i> astaxanthin. For <b>BPH-Asx</b> , several peaks were identified at 12.2 minutes (%3), at 12.9 minutes (%81), at 13.9 minutes (%6), at 14.1 minutes (%6) and at 15.6 minutes (%4) .....                            | 6  |
| <b>Figure S6:</b> Normalized absorption spectra of peaks from HPLC analysis of a) <b>Asx</b> and b) <b>BPH-Asx</b> . Spectra were extracted directly from HPLC. ....                                                                                                                                                                                                                                                                                                      | 7  |
| <b>Figure S7:</b> Fluorescence spectra of <b>Asx</b> and <b>BPH-Asx</b> .....                                                                                                                                                                                                                                                                                                                                                                                             | 8  |
| <b>Figure S8:</b> Steady state absorption spectra of astaxanthin ( <b>Asx</b> ) and <b>BPH-Asx</b> in benzene.....                                                                                                                                                                                                                                                                                                                                                        | 9  |
| <b>Figure S9:</b> Normalized transient absorption spectra of a) <b>BPH-Asx</b> in ACN (black), and <b>BPH-Asx</b> in benzene (blue). The spectra were measured at 1 ps after excitation 500 nm for all compounds/solvents. Normalized kinetics b) measured at the S <sub>1</sub> -S <sub>n</sub> maximum of same compounds in polar and non-polar solvents. Kinetics are also normalized to maximum; the lines represent fits obtained from global fitting analysis. .... | 10 |
| <b>Figure S10:</b> Relaxed ground state structures of <b>Asx</b> (top) and <b>BPH-Asx</b> (bottom). The atoms forming the dihedral angle are shown in cyan.....                                                                                                                                                                                                                                                                                                           | 11 |

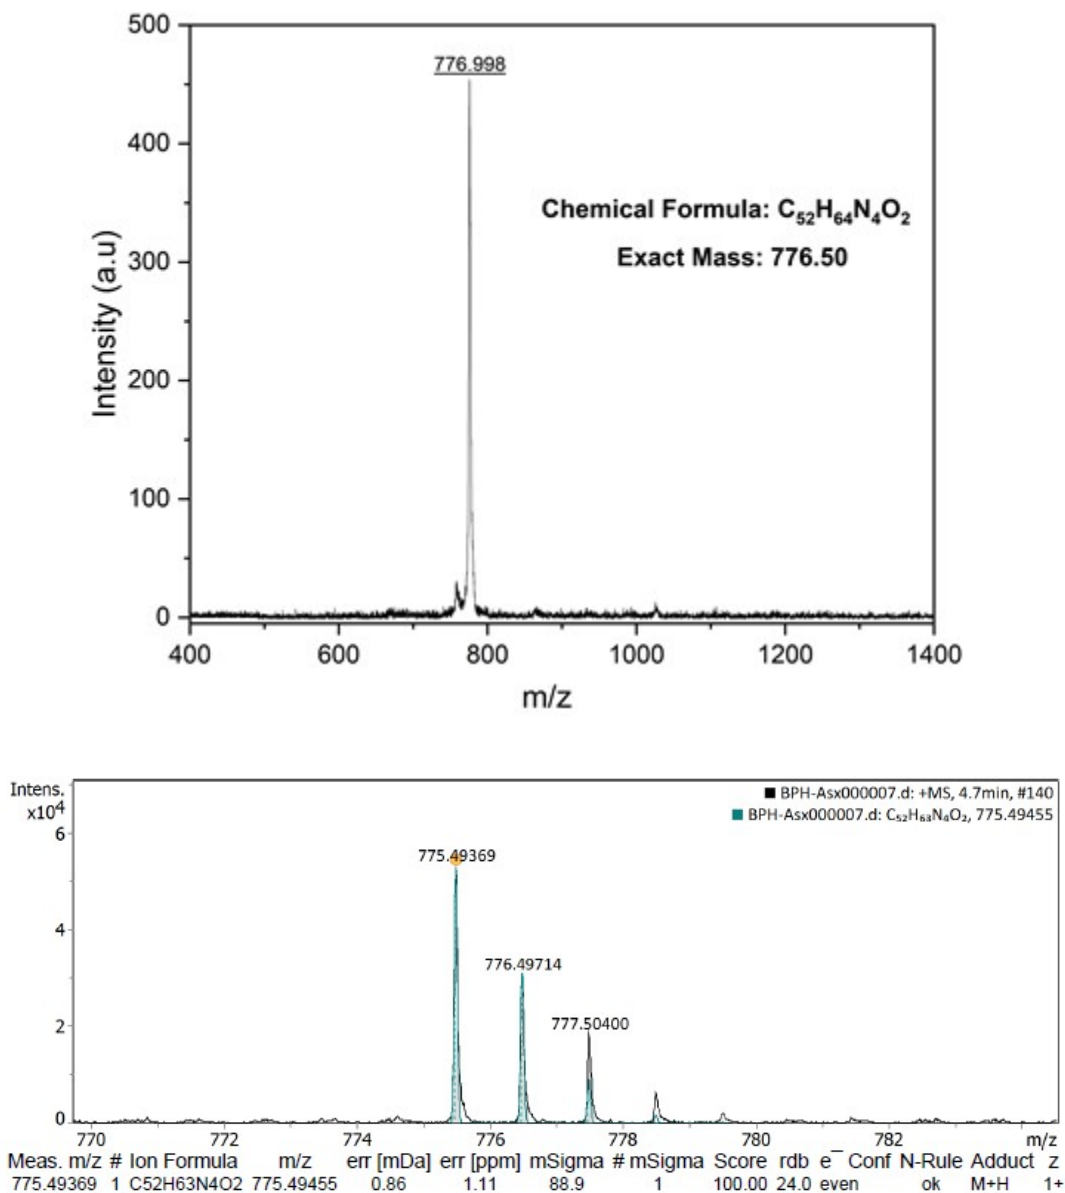

**Figure S1:** Top: Positive ion and linear mode MALDI TOF-MS spectrum of **BPH-Asx**. Bottom: ESI-MS Spectrum of **BPH-Asx** demonstrating difference between experimental and calculated mass of 1.1 ppm.

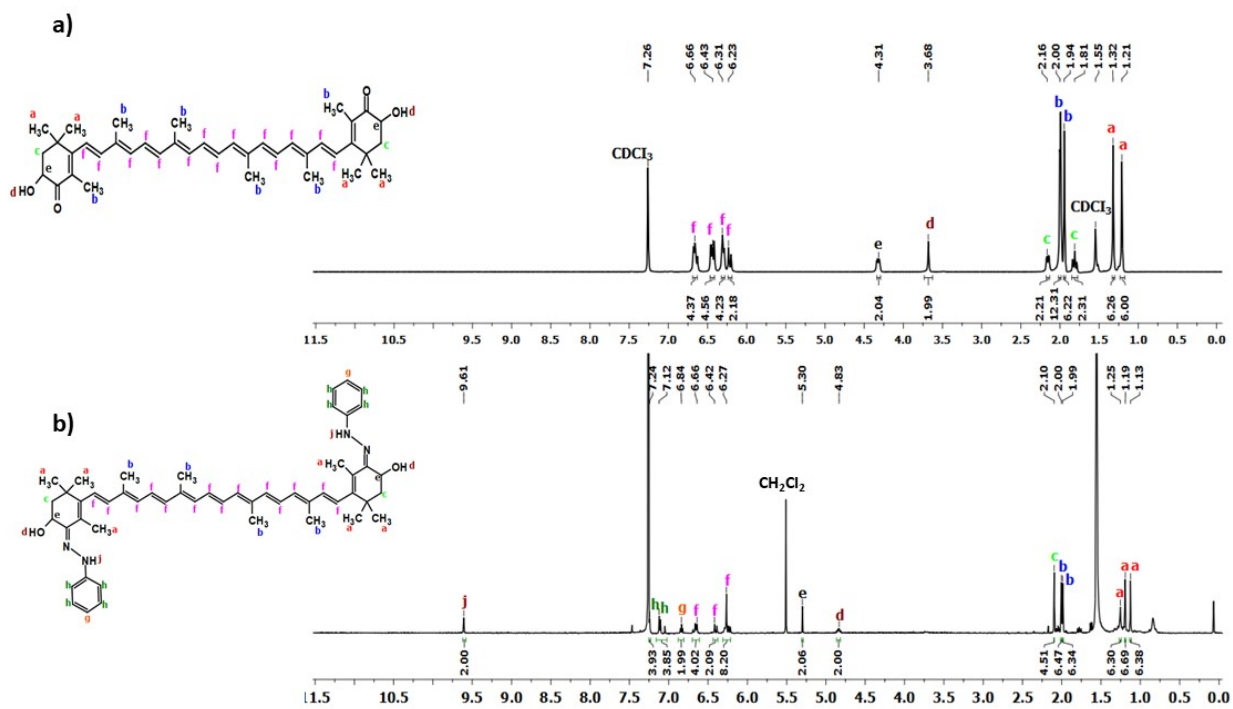

**Figure S2:**  $^1\text{H}$  NMR Spectrum of a) **Asx** b) **BPH-Asx** in  $\text{CDCl}_3$ .

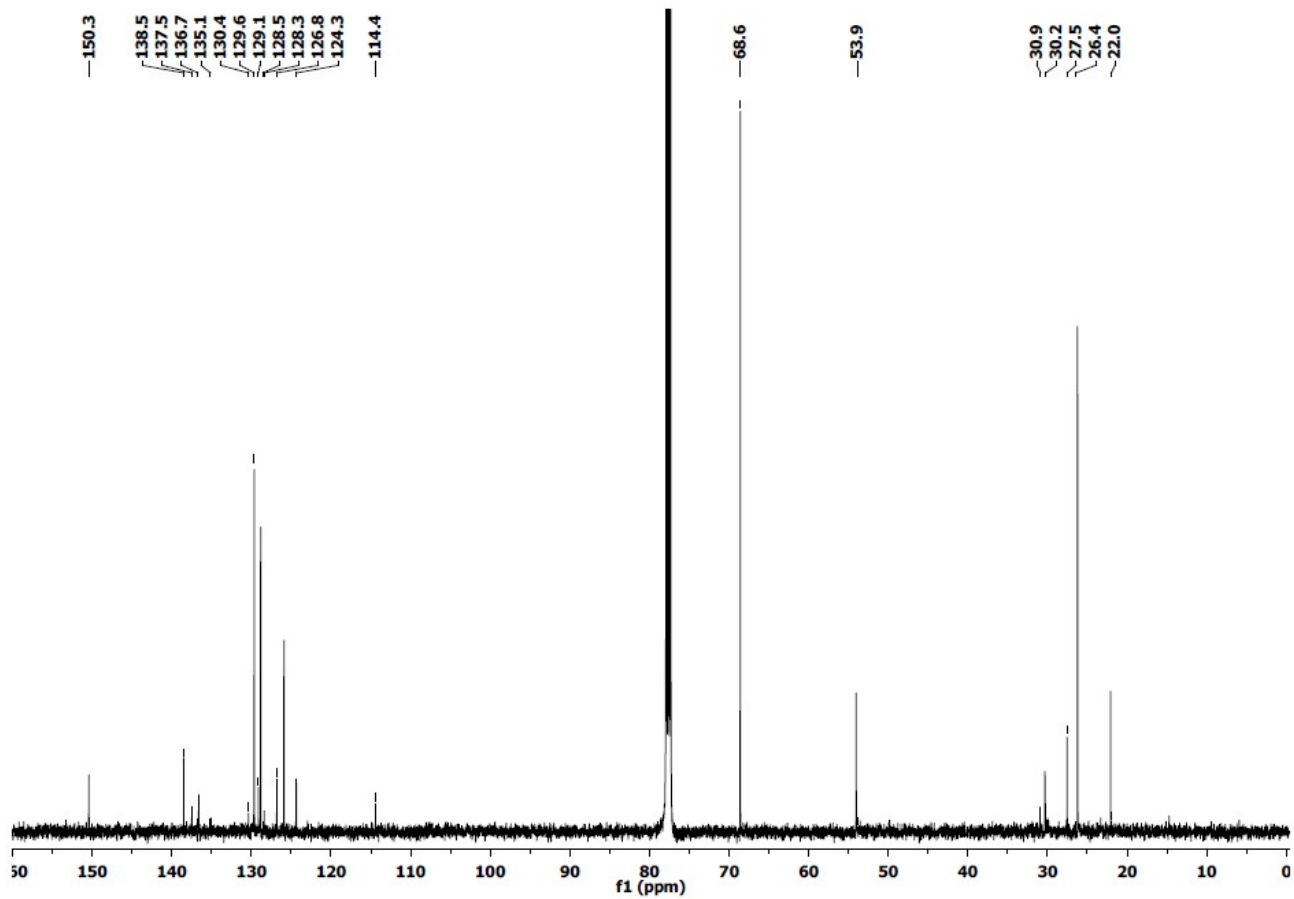

Figure S3:  $^{13}\text{C}$  NMR Spectrum of BPH-Asx in  $\text{CDCl}_3$ .

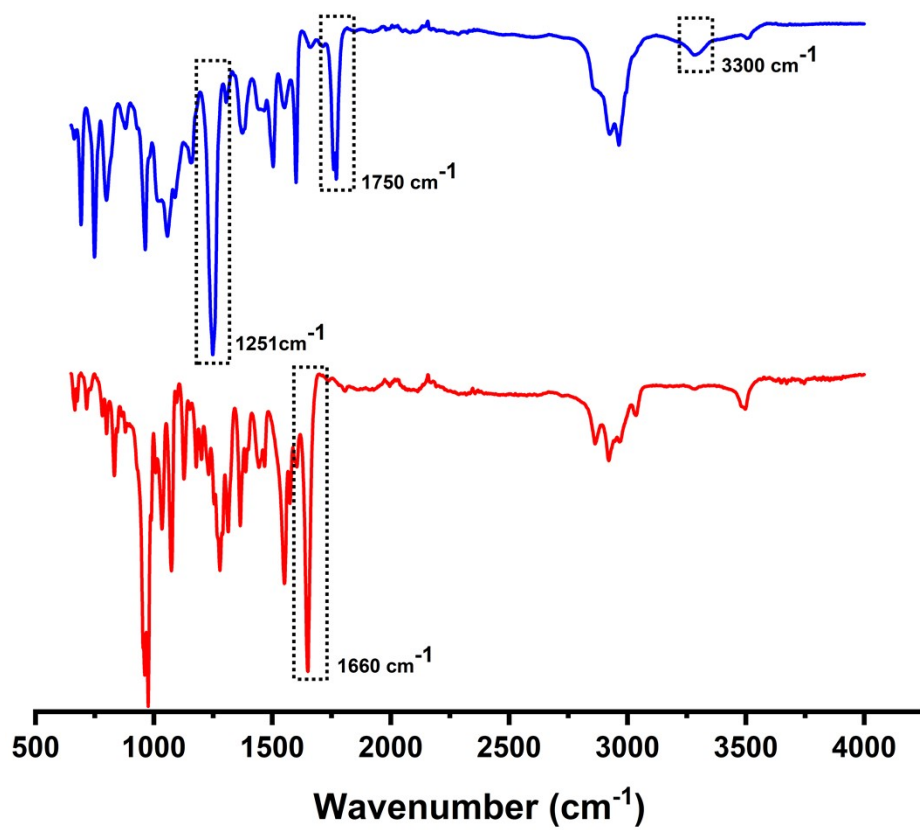

**Figure S4:** FT-IR Spectrum of **Asx** (red) and **BPH-Asx** (blue).

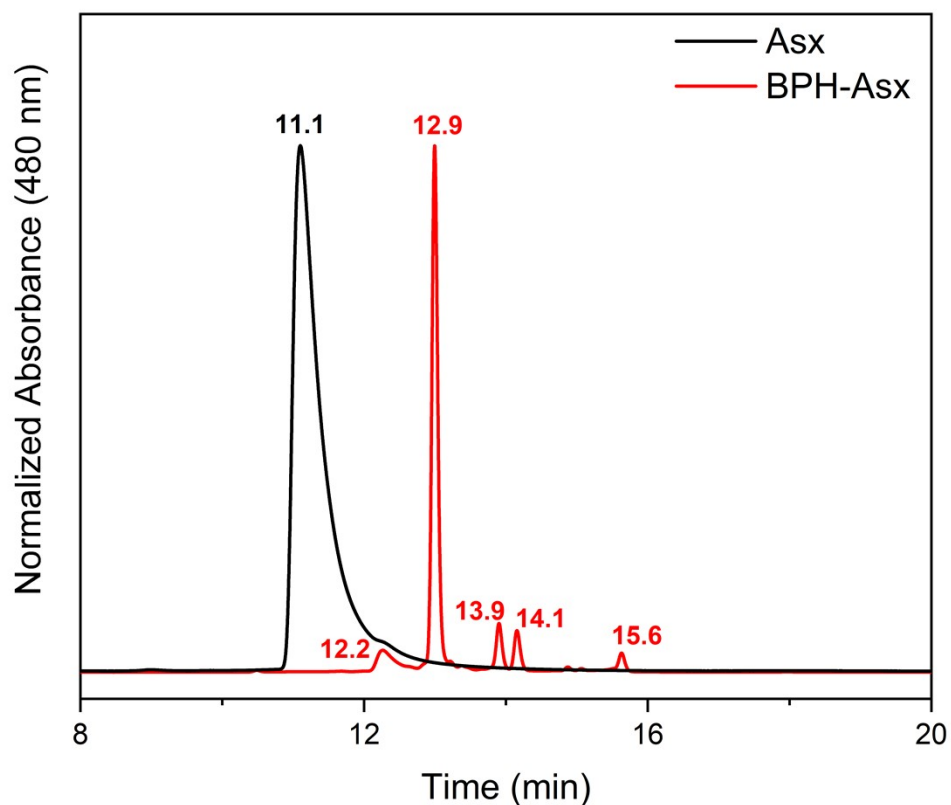

**Figure S5:** Normalized HPLC chromatograms of **Asx** (black) and **BPH-Asx** (red). Elution times of identified peaks are shown in the graph. The black chromatogram of **Asx** shows a single peak at 11.1 assigned to *all-trans* astaxanthin. For **BPH-Asx**, several peaks were identified at 12.2 minutes (%3), at 12.9 minutes (%81), at 13.9 minutes (%6), at 14.1 minutes (%6) and at 15.6 minutes (%4).

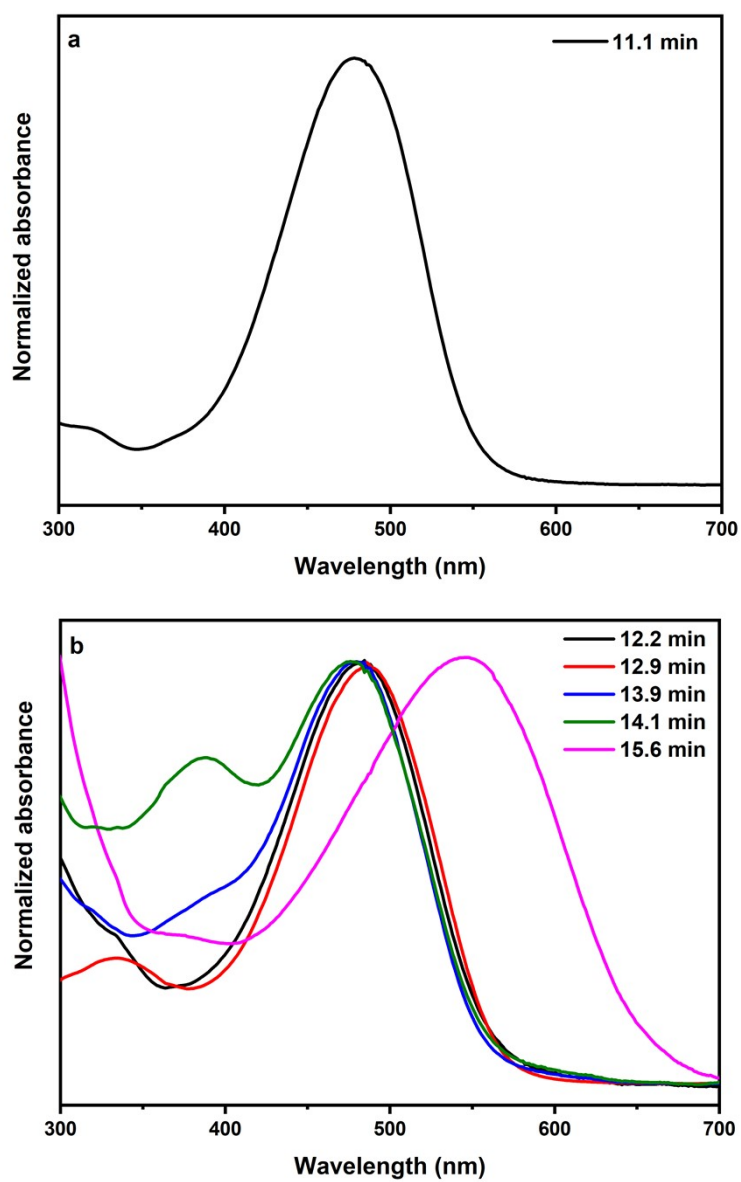

**Figure S6:** Normalized absorption spectra of peaks from HPLC analysis of a) **Asx** and b) **BPH-Asx**. Spectra were extracted directly from HPLC.



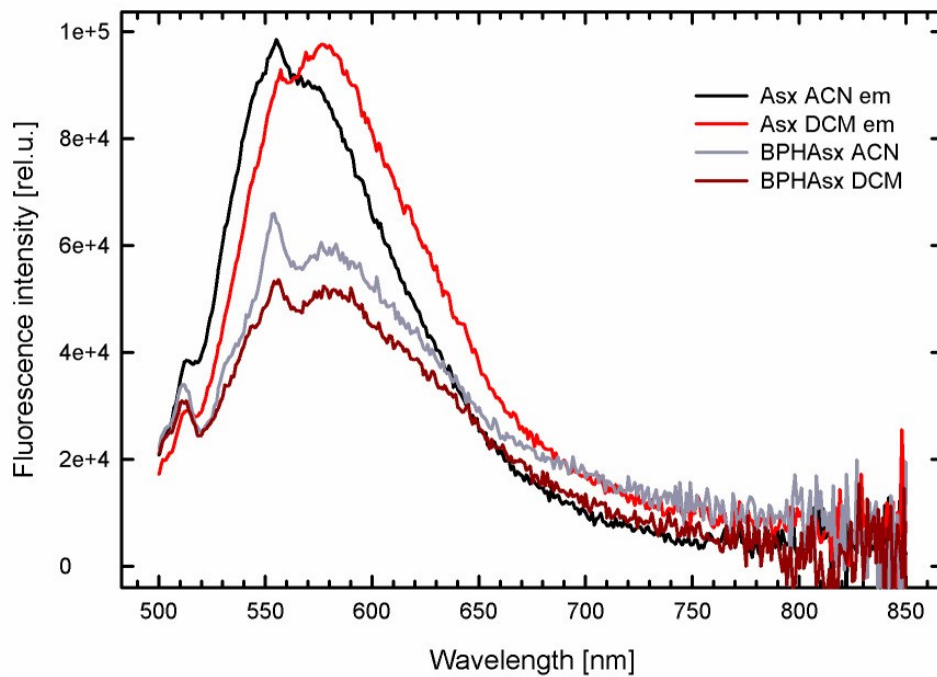

**Figure S7.** Fluorescence spectra of **Asx** And **BPH-Asx** in DCM and ACN. The sharp peaks are due to Raman bands. The spectra were measured with 5 nm bandpass and were corrected for instrument response. All spectra were excited at 475 nm, absorbance of the samples at this wavelength was 0.4-0.8 (3 mm path length), and the data are normalized to equal absorption at 475 nm.

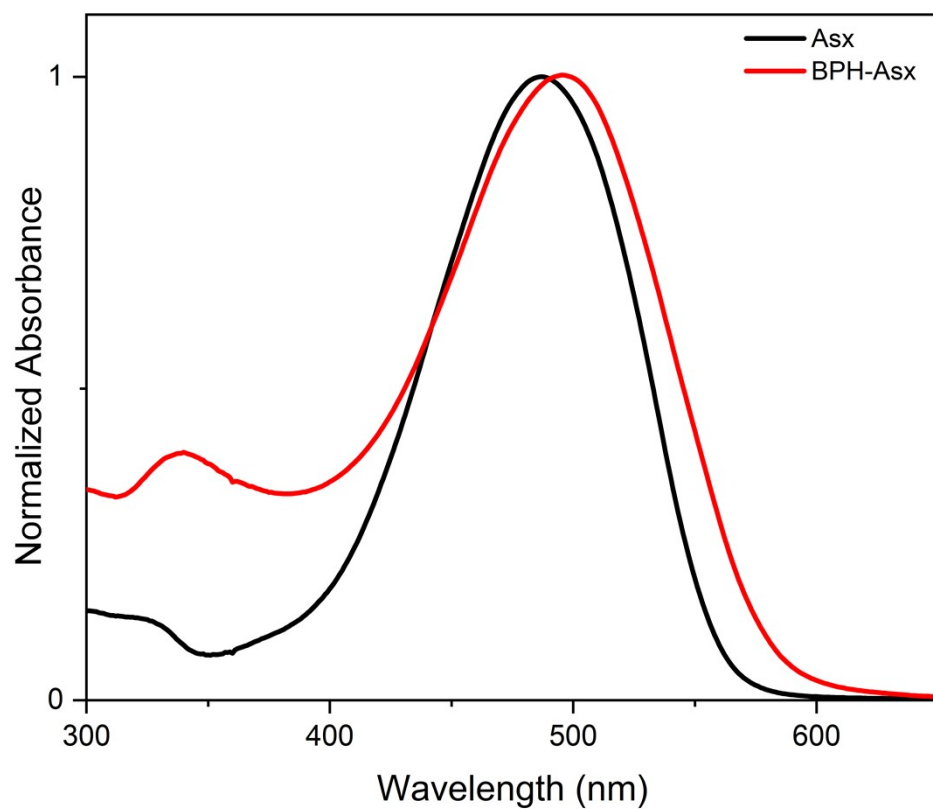

**Figure S8.** Steady state absorption spectra of astaxanthin (**Asx**) and **BPH-Asx** in benzene.

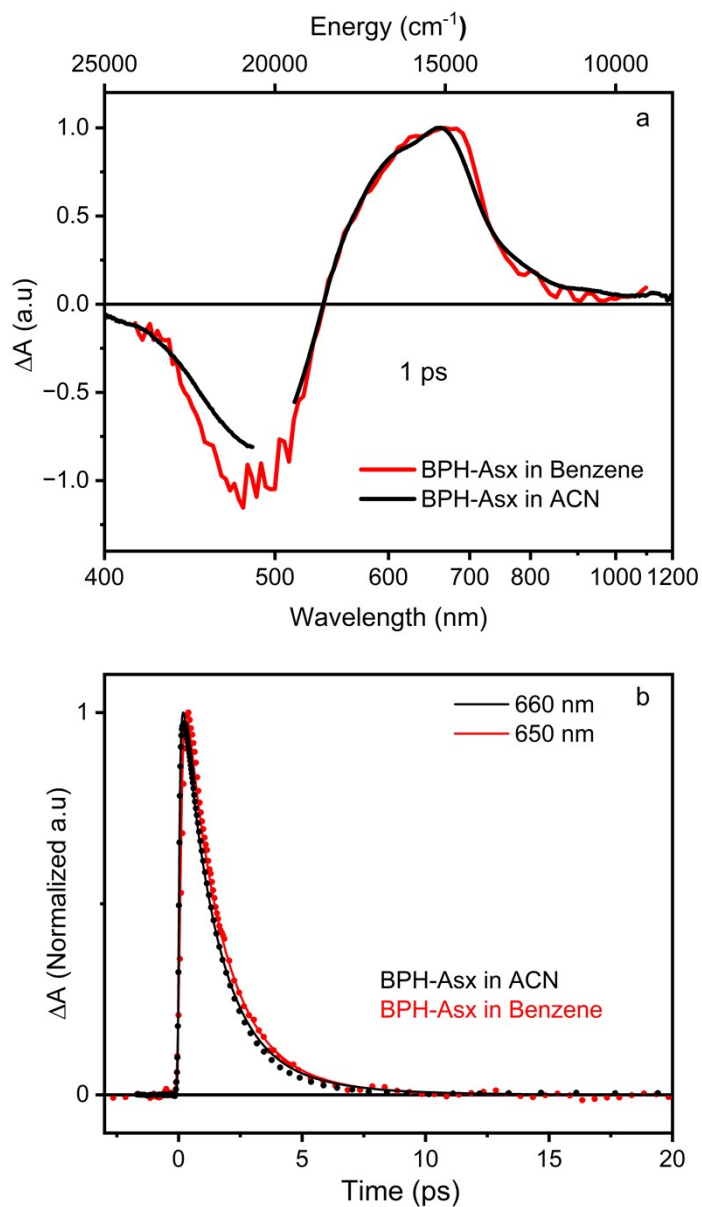

**Figure S9:** Normalized transient absorption spectra of a) **BPH-Asx** in ACN (black), and **BPH-Asx** in benzene (blue). The spectra were measured at 1 ps after excitation 500 nm for all compounds/solvents. Normalized kinetics b) measured at the  $S_1$ - $S_n$  maximum of same compounds in polar and non-polar solvents. Kinetics are also normalized to maximum; the lines represent fits obtained from global fitting analysis.

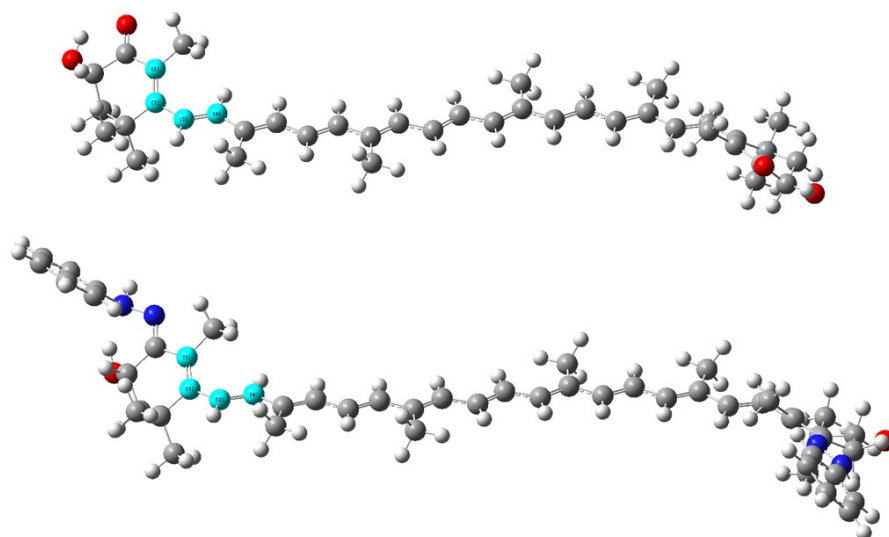

**Figure S10.** Relaxed ground state structures of **Asx** (top) and **BPH-Asx** (bottom). The atoms forming the dihedral angle are shown in cyan.
